# Supplementary material
Source: publisher figshare collection journal article supplement (https://brill.figshare.com/articles/dataset/_/21213596)
Supplement: Supplementary file 1 [file 1]

# The conservation paradox of an introduced population of a threatened species: spadefoot toads in the coastal dunes of the Netherlands

Stephanie Koster<sup>1,2,\*</sup>, Nienke Prins<sup>1,2,\*</sup>, Christophe Dufresnes<sup>3</sup>, James France<sup>1,2</sup>, Manon C. de Visser<sup>1,2</sup>, Richard P.J.H. Struijk<sup>4</sup>, Ben Wielstra<sup>1,2,\*\*</sup>

1 - Naturalis Biodiversity Center, P.O. Box 9517, 2300 RA Leiden, The Netherlands

2 - Institute of Biology Leiden, Leiden University, P.O. Box 9505, 2300 RA Leiden, The Netherlands

3 - LASER, College of Biology and The Environment, Nanjing Forestry University, Nanjing 210037, China

4 - Reptile, Amphibian and Fish Conservation Netherlands (RAVON), P.O. Box 1413, 6501 BK Nijmegen, The Netherlands

\*These authors contributed equally to this work.

\*\*Corresponding author; e-mail: ben.wielstra@naturalis.nl

ORCID iD: Wielstra: 0000-0002-7112-5965

Received 26 May 2022; final revision received 3 September 2022; accepted 22 September 2022

Associate Editor: Sebastian Steinfartz

## Supplementary material

**Table S1.** Sampling details for common spadefoot toad (*Pelobates fuscus*) populations.
